# Supplementary material
Source: PubMed Central journal article supplement (PMC3872517)
Supplement: NIHMS521527-supplement-supplement_1.pdf [file NIHMS521527-supplement-supplement_1.pdf]

## APPENDIX A. SUPPLEMENTARY TABLE

## Association of Frontal QRS-T Angle with B-type Natriuretic Peptide and Echocardiographic Parameters on Unadjusted and Multivariable Adjusted Linear Regression Analysis after Excluding Patients with QRS Duration &gt; 120 ms

| Dependent variable                     | Unadjusted                    |         | Multivariable-adjusted*       |         |
|----------------------------------------|-------------------------------|---------|-------------------------------|---------|
|                                        | $\beta$ -Coefficient (95% CI) | P-value | $\beta$ -Coefficient (95% CI) | P-value |
| • Log BNP, pg/ml                       | 0.49 (0.32, 0.65)             | <0.001  | 0.17 (0.00, 0.33)             | 0.048   |
| • Tissue Doppler S' velocity, cm/s     | -0.52 (-0.75, -0.28)          | <0.001  | -0.35 (-0.61, -0.09)          | 0.008   |
| • Tissue Doppler E' velocity, cm/s     | -0.53 (-0.85, -0.22)          | 0.001   | -0.53 (-0.89, -0.17)          | 0.004   |
| • E/E' ratio                           | 1.73 (0.81, 2.66)             | <0.001  | 1.23 (0.24, 2.22)             | 0.015   |
| • Isovolumic relaxation time, ms       | 6.47 (3.90, 9.03)             | <0.001  | 5.21 (2.18, 8.25)             | 0.001   |
| • LV mass index, g/m <sup>2</sup>      | 10.40 (6.53, 14.26)           | <0.001  | 5.17 (0.68, 9.66)             | 0.024   |
| • TAPSE, cm                            | -0.17 (-0.24, -0.10)          | <0.001  | -0.15 (-0.23, -0.07)          | <0.001  |
| • RV wall thickness, mm/m <sup>2</sup> | 0.18 (0.08, 0.23)             | <0.001  | 0.11 (0.04, 0.18)             | 0.001   |

*BNP* = B-type natriuretic peptide; *TAPSE* = tricuspid annular plane systolic excursion; *RV* = right ventricular; *LV* = left ventricular; CI = confidence interval.

\*Multivariable model adjusted for age, sex, body-mass index, diabetes mellitus, atrial fibrillation, coronary artery disease, estimated glomerular filtration rate, amiodarone use, diuretic use, QRS interval, and QTc interval.

## APPENDIX B. SUPPLEMENTAL TABLE

## Association of Frontal QRS-T Angle with Adverse Outcomes on Cox Proportional Hazards Analysis after Excluding Patients with QRS Duration &gt; 120 ms

| Outcome                                 | Event rate<br>(n/N, %) | Unadjusted |          |         | Multivariable-adjusted |          |         |
|-----------------------------------------|------------------------|------------|----------|---------|------------------------|----------|---------|
|                                         |                        | HR         | 95% CI   | P-value | HR                     | 95% CI   | P-value |
| Heart failure hospitalization           |                        |            |          |         |                        |          |         |
| • Tertile 1                             | 19/110 (17)            | —          | —        | —       | —                      | —        | —       |
| • Tertile 2                             | 28/108 (26)            | 1.6        | 0.9, 2.9 | 0.12    | 1.5                    | 0.8, 2.8 | 0.22    |
| • Tertile 3                             | 35/114 (31)            | 2.1        | 1.2, 3.7 | 0.01    | 1.7                    | 0.9, 3.3 | 0.028   |
| Cardiovascular hospitalization          |                        |            |          |         |                        |          |         |
| • Tertile 1                             | 24/110 (22)            | —          | —        | —       | —                      | —        | —       |
| • Tertile 2                             | 44/108 (41)            | 2.1        | 1.2, 3.4 | 0.005   | 1.8                    | 1.1, 3.1 | 0.025   |
| • Tertile 3                             | 43/114 (38)            | 2.1        | 1.3, 3.5 | 0.004   | 1.8                    | 1.0, 3.3 | 0.046   |
| Death                                   |                        |            |          |         |                        |          |         |
| • Tertile 1                             | 10/110 (9)             | —          | —        | —       | —                      | —        | —       |
| • Tertile 2                             | 14/108 (13)            | 1.4        | 0.6, 3.1 | 0.43    | 1.0                    | 0.4, 2.5 | 0.95    |
| • Tertile 3                             | 20/114 (18)            | 2.0        | 0.9, 4.3 | 0.07    | 2.1                    | 0.8, 5.0 | 0.11    |
| Cardiovascular hospitalization or death |                        |            |          |         |                        |          |         |
| • Tertile 1                             | 29/110 (26)            | —          | —        | —       | —                      | —        | —       |
| • Tertile 2                             | 52/108 (48)            | 2.1        | 1.3, 3.4 | 0.002   | 1.9                    | 1.1, 3.1 | 0.01    |
| • Tertile 3                             | 58/114 (51)            | 2.4        | 1.5, 3.8 | <0.001  | 2.1                    | 1.2, 3.5 | 0.009   |

*HR* = hazard ratio; *CI* = confidence interval.

\*Multivariable model adjusted for age, sex, body-mass index, diabetes mellitus, atrial fibrillation, coronary artery disease, estimated glomerular filtration rate, amiodarone use, diuretic use, QRS interval, and QTc interval.
